# Supplementary material for: Predictive value of DNA methylation in the efficacy of chemotherapy for gastric cancer
Source: Front Oncol. 2023 Sep 12;13:1238310. doi: 10.3389/fonc.2023.1238310 (PMC10523571; doi:10.3389/fonc.2023.1238310)
Supplement: Supplementary file 1 [file Table_1.xlsx]

## Sheet: Table S1
Table S1: Results of 308 genes with prognostic value for GC patients received chemotherapy.
No.	Gene	GCs with chemotherapy				GCs without chemotherapy
		P	HR	HR 95% CI下限	HR 95% CI上限	P	HR	HR 95% CI lower	HR 95% CI upper
1	ACP6	0.0143	3.46	1.28	9.32	0.193	1.44	0.832	2.49
2	ACSM3	0.0189	3.07	1.2	7.82	0.239	1.38	0.805	2.38
3	ACSS3	0.0346	0.363	0.142	0.929	0.214	1.41	0.821	2.42
4	ADAMTS18	0.0225	0.337	0.132	0.858	0.52	1.19	0.695	2.05
5	ADARB2	0.0234	0.34	0.134	0.864	0.694	0.897	0.522	1.54
6	ADCY2	0.0176	0.323	0.127	0.821	0.821	0.939	0.543	1.62
7	ADCYAP1	0.0451	0.399	0.163	0.98	0.43	1.24	0.724	2.13
8	ALPL	0.0417	0.376	0.147	0.964	0.698	1.11	0.646	1.92
9	AMBP	0.0248	2.93	1.15	7.51	0.819	0.938	0.544	1.62
10	APBB1	0.0114	3.34	1.31	8.5	0.316	0.758	0.441	1.3
11	APOL6	0.0265	2.77	1.13	6.81	0.963	1.01	0.59	1.74
12	ARHGAP30	0.033	0.339	0.125	0.917	0.448	1.23	0.718	2.11
13	ARHGEF16	0.0435	2.61	1.03	6.64	0.341	0.769	0.447	1.32
14	ARL13B	0.0166	3.39	1.25	9.19	0.794	1.07	0.626	1.84
15	ARMC4	0.0334	0.363	0.143	0.924	0.297	0.747	0.432	1.29
16	B3GNT8	0.00796	4.32	1.47	12.7	0.883	1.04	0.606	1.79
17	BAI3	0.0106	0.274	0.102	0.739	0.262	0.731	0.423	1.26
18	BAIAP3	0.0217	0.349	0.142	0.857	0.725	0.907	0.526	1.56
19	BEND4	0.0491	0.387	0.15	0.996	0.465	0.817	0.476	1.4
20	BHMT2	0.0378	0.369	0.144	0.946	0.438	0.806	0.467	1.39
21	BICC1	0.0474	0.406	0.166	0.99	0.646	1.14	0.659	1.96
22	BRSK1	0.0297	0.354	0.139	0.903	0.264	0.727	0.415	1.27
23	BTN2A2	0.0117	3.33	1.31	8.47	0.495	1.21	0.7	2.09
24	BTNL8	0.0427	2.64	1.03	6.76	0.392	1.27	0.736	2.19
25	C17orf104	0.0192	0.323	0.126	0.832	0.794	0.93	0.542	1.6
26	C1QL1	0.0187	0.302	0.111	0.819	0.508	1.2	0.699	2.06
27	C1QL2	0.0314	0.356	0.139	0.912	0.95	1.02	0.593	1.75
28	C3orf14	0.0318	0.376	0.154	0.919	0.202	0.7	0.405	1.21
29	C5orf38	0.0241	2.83	1.15	6.98	0.184	0.69	0.399	1.19
30	C6orf222	0.0481	2.58	1.01	6.59	0.664	0.886	0.514	1.53
31	C9orf47	0.0313	0.354	0.137	0.911	0.365	0.776	0.449	1.34
32	CA9	0.0318	2.79	1.09	7.11	0.129	1.53	0.884	2.64
33	CACNA1B	0.0117	0.277	0.102	0.752	0.526	1.19	0.694	2.04
34	CALML4	0.0194	3.06	1.2	7.79	0.654	0.883	0.513	1.52
35	CAPN8	0.0197	2.96	1.19	7.36	0.868	1.05	0.607	1.81
36	CAPN9	0.0216	3.04	1.18	7.84	0.805	0.934	0.542	1.61
37	CARD14	0.0487	2.47	1.01	6.06	0.42	1.25	0.726	2.16
38	CARD6	0.0207	3.03	1.18	7.73	0.571	1.17	0.678	2.03
39	CBS	0.0382	0.369	0.144	0.947	0.461	0.814	0.471	1.41
40	CCDC3	0.036	0.368	0.144	0.937	0.689	0.895	0.52	1.54
41	CCDC67	0.0271	0.365	0.15	0.892	0.478	0.822	0.478	1.41
42	CCDC8	0.0252	0.342	0.134	0.875	0.626	0.874	0.508	1.5
43	CCL28	0.0342	2.76	1.08	7.04	0.185	1.46	0.836	2.53
44	CCNA1	0.0318	0.358	0.14	0.915	0.743	1.09	0.637	1.88
45	CCNL1	0.0364	2.72	1.07	6.93	0.792	0.93	0.542	1.6
46	CD200	0.0435	0.398	0.163	0.974	0.983	1.01	0.586	1.73
47	CD34	0.0236	0.337	0.131	0.864	0.455	0.812	0.469	1.4
48	CD40	0.029	0.353	0.139	0.899	0.333	0.765	0.445	1.32
49	CD93	0.00814	0.281	0.109	0.719	0.964	0.988	0.575	1.7
50	CDC42BPG	0.00482	3.89	1.51	10	0.0502	1.74	0.999	3.02
51	CDC42EP4	0.00531	3.83	1.49	9.86	0.152	1.49	0.862	2.58
52	CDH2	0.0235	0.34	0.134	0.865	0.988	0.996	0.58	1.71
53	CDO1	0.0358	0.366	0.143	0.936	0.817	1.07	0.621	1.83
54	CDX1	0.0437	2.62	1.03	6.68	0.213	1.42	0.819	2.45
55	CHPF	0.0127	3.3	1.29	8.46	0.829	1.06	0.619	1.82
56	CHRDL2	0.028	0.349	0.137	0.892	0.83	0.942	0.545	1.63
57	CLDN10	0.0191	0.326	0.128	0.833	0.476	0.82	0.476	1.41
58	CLDN11	0.0417	0.378	0.148	0.964	0.196	0.695	0.401	1.21
59	CLIC5	0.0243	3.15	1.16	8.53	0.946	0.982	0.572	1.68
60	CLVS2	0.0411	0.377	0.148	0.961	0.51	0.833	0.484	1.43
61	CMAS	0.0195	3.05	1.2	7.79	0.844	1.06	0.613	1.82
62	CMYA5	0.0423	0.41	0.173	0.97	0.18	0.683	0.391	1.19
63	CNRIP1	0.0376	0.369	0.144	0.945	0.663	1.13	0.657	1.93
64	COL23A1	0.0315	0.358	0.14	0.913	0.141	0.66	0.38	1.15
65	COLEC11	0.0475	0.419	0.177	0.991	0.172	0.679	0.39	1.18
66	COX7A1	0.0393	0.404	0.17	0.957	0.722	1.1	0.643	1.89
67	CPAMD8	0.009	0.234	0.0789	0.696	0.541	1.19	0.688	2.04
68	CPLX2	0.0307	0.354	0.138	0.908	0.746	0.914	0.532	1.57
69	CPPED1	0.0493	2.57	1	6.61	0.604	1.15	0.671	1.99
70	CREBZF	0.0228	2.81	1.15	6.84	0.845	0.948	0.552	1.63
71	CRISP2	0.0441	0.4	0.164	0.976	0.466	0.816	0.472	1.41
72	CTSS	0.0415	2.45	1.04	5.81	0.411	1.26	0.728	2.17
73	CXCL5	0.0376	0.372	0.146	0.945	0.624	0.874	0.509	1.5
74	CYP2B7P1	0.0117	3.62	1.33	9.82	0.926	0.975	0.568	1.67
75	DDX4	0.0346	2.7	1.07	6.78	0.932	1.02	0.597	1.76
76	DENND1B	0.0335	2.55	1.08	6.05	0.433	1.24	0.722	2.14
77	DMGDH	0.0378	0.369	0.144	0.946	0.438	0.806	0.467	1.39
78	DMRT3	0.0358	0.367	0.144	0.936	0.577	0.857	0.497	1.48
79	DOPEY2	0.0225	3.53	1.19	10.4	0.916	1.03	0.6	1.77
80	DSN1	0.017	3.12	1.23	7.93	0.495	0.828	0.482	1.42
81	DSTYK	0.0165	3.13	1.23	7.96	0.652	1.13	0.66	1.94
82	DUOX1	0.0497	0.416	0.173	0.999	0.253	0.727	0.421	1.26
83	DUOXA1	0.0384	0.397	0.165	0.952	0.0997	0.63	0.364	1.09
84	DYRK1B	0.0148	3.19	1.25	8.12	0.402	1.26	0.732	2.18
85	EDARADD	0.0354	0.367	0.145	0.934	0.551	0.848	0.494	1.46
86	EFNB3	0.0159	0.295	0.109	0.796	0.945	0.981	0.572	1.68
87	ELF3	0.0199	3.04	1.19	7.75	0.59	1.16	0.674	2
88	EMILIN1	0.0353	0.4	0.171	0.939	0.775	0.924	0.537	1.59
89	ENOX1	0.0473	0.405	0.166	0.989	0.255	0.726	0.419	1.26
90	ENTPD8	0.0222	3	1.17	7.67	0.762	1.09	0.632	1.87
91	EPHB6	0.0481	0.407	0.167	0.992	0.173	0.683	0.395	1.18
92	ERBB3	0.0346	2.74	1.08	7	0.78	1.08	0.628	1.86
93	EVC2	0.0395	0.373	0.146	0.954	0.619	0.871	0.506	1.5
94	FAM133A	0.0453	0.401	0.164	0.981	0.619	0.871	0.507	1.5
95	FAM163A	0.0225	0.352	0.144	0.863	0.0703	0.598	0.342	1.04
96	FAM184B	0.0166	0.295	0.108	0.801	0.0772	0.607	0.349	1.06
97	FAM200A	0.0462	2.48	1.02	6.05	0.501	0.83	0.481	1.43
98	FAM83E	0.0365	2.61	1.06	6.42	0.516	0.836	0.487	1.43
99	FARP1	0.00323	5.12	1.73	15.2	0.768	0.922	0.537	1.58
100	FBXO32	0.0143	3.46	1.28	9.35	0.232	1.4	0.808	2.41
101	FCAMR	0.015	3.22	1.25	8.24	0.948	1.02	0.593	1.75
102	FERMT3	0.045	2.51	1.02	6.16	0.482	1.21	0.706	2.09
103	FGF10	0.00961	0.268	0.099	0.726	0.874	1.04	0.609	1.79
104	FGFR1	0.0369	0.37	0.145	0.941	0.161	0.673	0.388	1.17
105	FLI1	0.0367	0.366	0.143	0.94	0.304	0.752	0.436	1.3
106	FOXE1	0.0082	0.26	0.0957	0.706	0.538	0.843	0.49	1.45
107	FOXH1	0.0283	2.88	1.12	7.42	0.811	0.936	0.546	1.61
108	FTSJD1	0.00269	4.58	1.69	12.4	0.534	1.19	0.691	2.04
109	FUT3	0.0167	3.37	1.25	9.11	0.245	1.38	0.802	2.38
110	FUT6	0.0228	2.87	1.16	7.09	0.089	1.62	0.929	2.81
111	FXYD4	0.0228	3.17	1.17	8.58	0.551	1.18	0.686	2.03
112	GABRG3	0.0218	0.332	0.13	0.852	0.467	1.22	0.712	2.1
113	GAL3ST3	0.0281	0.381	0.161	0.902	0.27	1.36	0.789	2.33
114	GAMT	0.0126	0.281	0.104	0.762	0.439	0.806	0.466	1.39
115	GBGT1	0.0407	0.374	0.146	0.959	0.263	0.733	0.425	1.26
116	GCKR	0.0124	3.56	1.32	9.63	0.796	1.07	0.626	1.84
117	GFRA2	0.00961	0.267	0.0985	0.726	0.576	0.857	0.499	1.47
118	GJB6	0.0327	0.358	0.139	0.919	0.402	0.793	0.461	1.36
119	GLDC	0.0418	0.376	0.147	0.964	0.273	0.737	0.428	1.27
120	GLI3	0.0185	0.326	0.128	0.829	0.326	0.76	0.439	1.31
121	GMPR	0.0453	2.52	1.02	6.21	0.903	1.03	0.602	1.78
122	GNAO1	0.0476	0.405	0.166	0.99	0.251	0.725	0.419	1.26
123	GNG4	0.0376	0.37	0.145	0.944	0.941	0.98	0.571	1.68
124	GPC6	0.0174	0.319	0.125	0.818	0.613	0.869	0.505	1.5
125	GPRASP1	0.0421	0.375	0.146	0.965	0.18	0.683	0.392	1.19
126	GRIA2	0.0412	0.395	0.162	0.963	0.748	0.915	0.533	1.57
127	GRIN2A	0.0391	0.39	0.159	0.954	0.673	1.12	0.654	1.93
128	GSTM2	0.0111	0.244	0.0822	0.725	0.649	0.882	0.514	1.51
129	GSTM5	0.019	0.323	0.126	0.831	0.71	0.902	0.525	1.55
130	GTF2E1	0.0357	2.52	1.06	5.99	0.49	0.827	0.482	1.42
131	GZF1	0.0377	0.366	0.142	0.944	0.885	0.961	0.56	1.65
132	HEPH	0.0374	2.57	1.06	6.27	0.191	1.45	0.832	2.51
133	HLA.DQB1	0.0108	3.27	1.32	8.14	0.0644	1.69	0.969	2.93
134	HOXA6	0.0163	3.06	1.23	7.62	0.6	1.16	0.671	2
135	HOXB4	0.0487	0.406	0.166	0.995	0.993	0.998	0.582	1.71
136	HOXB9	0.0311	2.68	1.09	6.58	0.594	1.16	0.672	2
137	HOXD1	0.0465	0.404	0.166	0.986	0.187	0.692	0.4	1.2
138	HSD17B8	0.0414	2.47	1.04	5.91	0.932	1.02	0.596	1.76
139	HYLS1	0.0243	2.95	1.15	7.56	0.944	1.02	0.594	1.75
140	ICA1	0.0482	2.58	1.01	6.6	0.415	1.25	0.728	2.16
141	IGF2BP1	0.0374	0.37	0.145	0.943	0.505	0.831	0.482	1.43
142	IGSF9B	0.0158	3.4	1.26	9.17	0.67	1.12	0.656	1.93
143	IL12RB1	0.0305	2.7	1.1	6.63	0.55	0.848	0.494	1.46
144	IRX2	0.0221	2.87	1.16	7.07	0.145	0.665	0.384	1.15
145	ITIH5	0.027	0.347	0.136	0.887	0.436	1.24	0.722	2.13
146	JPH3	0.0391	0.372	0.146	0.952	0.47	1.22	0.708	2.11
147	KANK4	0.0162	0.293	0.107	0.796	0.446	0.808	0.467	1.4
148	KCNN4	0.0223	2.98	1.17	7.62	0.741	0.913	0.532	1.57
149	KLHDC9	0.014	3.15	1.26	7.87	0.488	1.21	0.704	2.08
150	KLHL26	0.00923	3.46	1.36	8.81	0.549	1.18	0.687	2.03
151	KLK13	0.0351	2.75	1.07	7.04	0.172	1.47	0.847	2.53
152	LACTB2	0.0421	0.407	0.171	0.968	0.812	1.07	0.623	1.83
153	LBH	0.0468	0.405	0.166	0.987	0.647	0.881	0.512	1.52
154	LGALS9	0.0138	3.24	1.27	8.26	0.0609	1.7	0.976	2.98
155	LOC100126784	0.0123	0.281	0.104	0.759	0.775	1.08	0.631	1.85
156	LOC145837	0.0311	2.98	1.1	8.03	0.98	0.993	0.578	1.71
157	LOC731779	0.0108	3.45	1.33	8.94	0.78	0.926	0.539	1.59
158	LPAR3	0.0278	0.351	0.138	0.892	0.28	0.739	0.427	1.28
159	LRFN5	0.0404	0.394	0.161	0.96	0.531	1.19	0.693	2.04
160	LRRN1	0.00772	0.229	0.0772	0.677	0.0564	0.587	0.339	1.01
161	LY75	0.037	2.57	1.06	6.24	0.0509	1.73	0.998	3.02
162	MACC1	0.0288	2.71	1.11	6.6	0.492	1.21	0.702	2.08
163	MAGI2	0.0303	0.372	0.152	0.91	0.229	1.4	0.811	2.4
164	MAMDC2	0.0214	0.33	0.128	0.849	0.517	0.834	0.482	1.44
165	MAP1B	0.0375	0.388	0.159	0.947	0.804	0.934	0.544	1.6
166	MAPRE1	0.00666	3.65	1.43	9.28	0.987	0.995	0.58	1.71
167	MARCH3	0.00585	4.04	1.5	10.9	0.899	0.966	0.564	1.66
168	MINA	0.0251	2.91	1.14	7.4	0.845	0.947	0.552	1.63
169	MOGAT2	0.014	3.55	1.29	9.75	0.434	1.24	0.722	2.14
170	MORC2	0.0445	2.64	1.02	6.79	0.785	0.928	0.541	1.59
171	MRAP2	0.0312	2.83	1.1	7.28	0.903	1.03	0.603	1.77
172	MUC2	0.0304	2.81	1.1	7.15	0.989	0.996	0.581	1.71
173	MYEF2	0.0477	0.406	0.166	0.991	0.712	0.902	0.523	1.56
174	NAALAD2	0.0391	0.392	0.161	0.954	0.509	0.833	0.484	1.43
175	NAP1L3	0.0453	0.401	0.164	0.981	0.619	0.871	0.507	1.5
176	NCAM2	0.0328	0.377	0.154	0.923	0.32	0.757	0.438	1.31
177	NCCRP1	0.0331	0.358	0.139	0.921	0.408	0.795	0.462	1.37
178	NCS1	0.0251	0.358	0.146	0.88	0.465	1.23	0.71	2.12
179	NDRG4	0.0274	0.347	0.136	0.889	0.855	0.95	0.551	1.64
180	NPC1L1	0.00892	3.77	1.39	10.2	0.435	1.24	0.722	2.14
181	NPY1R	0.0465	0.404	0.166	0.986	0.234	0.715	0.412	1.24
182	NR0B2	0.033	2.96	1.09	8.03	0.185	1.45	0.836	2.52
183	NR1I2	0.0267	2.76	1.12	6.75	0.508	1.2	0.696	2.08
184	NRCAM	0.0289	0.352	0.138	0.898	0.645	0.88	0.512	1.51
185	NRIP3	0.0486	0.388	0.152	0.994	0.333	0.765	0.445	1.32
186	NRN1	0.0446	0.382	0.15	0.977	0.65	0.882	0.513	1.52
187	NSUN6	0.0264	2.74	1.13	6.67	0.546	0.847	0.494	1.45
188	NTNG1	0.0219	0.336	0.132	0.853	0.974	0.991	0.575	1.71
189	PALM	0.012	0.276	0.101	0.754	0.788	0.928	0.538	1.6
190	PARP11	0.0172	3.16	1.23	8.15	0.934	1.02	0.593	1.77
191	PCDH17	0.0175	0.323	0.127	0.82	0.517	1.2	0.694	2.07
192	PCDH8	0.0237	0.337	0.131	0.865	0.652	1.13	0.658	1.95
193	PCDHA4	0.0262	0.346	0.136	0.882	0.111	1.55	0.903	2.67
194	PCDHA5	0.00834	0.285	0.112	0.724	0.421	0.799	0.462	1.38
195	PDZD3	0.0443	2.61	1.02	6.66	0.917	0.972	0.565	1.67
196	PER3	0.0462	0.383	0.149	0.984	0.666	0.887	0.514	1.53
197	PGBD1	0.0293	2.71	1.11	6.65	0.794	1.07	0.626	1.84
198	PHGR1	0.0179	3.33	1.23	9.01	0.128	1.54	0.883	2.68
199	PHYHIPL	0.0476	0.407	0.167	0.99	0.87	0.956	0.556	1.64
200	PIK3R5	0.0152	0.312	0.122	0.799	0.126	1.53	0.888	2.64
201	PKIA	0.0205	0.332	0.131	0.844	0.418	1.25	0.729	2.14
202	PKP4	0.0139	3.5	1.29	9.48	0.507	0.832	0.483	1.43
203	PLA2G2F	0.0471	2.57	1.01	6.54	0.562	1.17	0.683	2.02
204	PLA2G3	0.0385	2.58	1.05	6.32	0.171	0.681	0.393	1.18
205	POM121L2	0.0216	0.335	0.132	0.851	0.773	0.924	0.537	1.59
206	POPDC2	0.0245	0.36	0.148	0.877	0.174	0.682	0.393	1.18
207	POU4F1	0.0236	0.315	0.116	0.856	0.632	0.876	0.51	1.51
208	PPL	0.0409	2.66	1.04	6.8	0.156	1.49	0.859	2.59
209	PPP1R16A	0.0411	2.65	1.04	6.74	0.712	1.11	0.643	1.91
210	PPP1R3G	0.0106	0.244	0.0828	0.72	0.269	0.735	0.426	1.27
211	PRKD1	0.0321	0.361	0.142	0.917	0.375	0.781	0.453	1.35
212	PTPN13	0.0489	0.407	0.167	0.996	0.965	0.988	0.575	1.7
213	PUS3	0.0262	2.75	1.13	6.7	0.543	1.18	0.688	2.03
214	PWWP2A	0.0133	3.09	1.27	7.54	0.659	1.13	0.657	1.94
215	PWWP2B	0.0363	2.72	1.07	6.95	0.0992	1.59	0.917	2.75
216	RAB6A	0.0402	2.54	1.04	6.18	0.549	1.18	0.686	2.03
217	RBM39	0.0182	3.07	1.21	7.81	0.577	0.858	0.5	1.47
218	REC8	0.0402	0.372	0.145	0.957	0.686	1.12	0.651	1.92
219	RFTN1	0.0264	0.347	0.137	0.883	0.813	0.937	0.546	1.61
220	RNF165	0.0377	0.371	0.146	0.945	0.974	1.01	0.588	1.73
221	RNF182	0.0316	0.359	0.141	0.914	0.388	0.785	0.454	1.36
222	RNF212	0.00452	0.208	0.0706	0.615	0.434	1.24	0.72	2.15
223	RPS18	0.0478	2.39	1.01	5.66	0.295	0.749	0.437	1.29
224	RSPO4	0.0284	0.351	0.138	0.895	0.196	0.695	0.4	1.21
225	RTP4	0.0197	2.91	1.19	7.14	0.264	1.37	0.788	2.38
226	RXFP4	0.0254	2.91	1.14	7.44	0.495	0.827	0.479	1.43
227	S100A1	0.0392	2.59	1.05	6.39	0.454	1.23	0.714	2.12
228	S1PR3	0.015	0.311	0.121	0.797	0.524	0.836	0.483	1.45
229	SCNN1B	0.0215	0.332	0.13	0.85	0.744	1.09	0.635	1.89
230	SCT	0.0492	0.391	0.154	0.997	0.257	0.729	0.422	1.26
231	SEPT10	0.0109	3.65	1.35	9.89	0.576	1.17	0.679	2
232	SH3GL2	0.0327	0.359	0.14	0.919	0.61	0.868	0.503	1.5
233	SHANK3	0.0314	0.358	0.14	0.912	0.612	0.868	0.503	1.5
234	SLC10A4	0.0412	0.375	0.147	0.962	0.417	0.798	0.464	1.37
235	SLC12A5	0.00901	0.266	0.0983	0.718	0.947	1.02	0.593	1.75
236	SLC15A4	0.0306	2.61	1.09	6.23	0.486	0.824	0.479	1.42
237	SLC1A4	0.0316	2.68	1.09	6.61	0.856	1.05	0.612	1.81
238	SLC27A6	0.03	0.352	0.137	0.904	0.564	1.17	0.683	2.01
239	SLC6A17	0.00613	0.25	0.0925	0.673	0.366	1.28	0.748	2.2
240	SLCO4C1	0.0258	0.345	0.135	0.879	0.911	0.97	0.565	1.66
241	SMO	0.024	0.339	0.133	0.867	0.64	0.878	0.509	1.52
242	SNAP91	0.0292	0.371	0.152	0.904	0.799	1.07	0.625	1.84
243	SNTG2	0.0177	0.321	0.126	0.821	0.888	0.962	0.559	1.65
244	SNURF	0.0433	0.398	0.163	0.973	0.339	1.3	0.758	2.23
245	SORCS2	0.036	0.366	0.143	0.937	0.589	0.861	0.499	1.48
246	SP140L	0.0205	3.02	1.19	7.68	0.878	1.04	0.605	1.8
247	SPSB4	0.0395	0.391	0.16	0.956	0.404	0.793	0.46	1.37
248	STMN2	0.0238	0.339	0.133	0.866	0.726	0.908	0.529	1.56
249	SULT1B1	0.0355	2.63	1.07	6.5	0.204	1.43	0.824	2.47
250	SUN1	0.0488	2.46	1	6.03	0.391	1.27	0.738	2.18
251	SUPT5H	0.0165	2.98	1.22	7.26	0.33	0.763	0.442	1.32
252	TAF2	0.0429	2.51	1.03	6.13	0.981	0.993	0.579	1.7
253	TCF15	0.0383	0.368	0.143	0.947	0.825	0.941	0.548	1.62
254	TDRD9	0.0245	0.341	0.134	0.871	0.237	0.717	0.413	1.24
255	TFCP2	0.0179	3.08	1.21	7.83	0.722	1.1	0.642	1.9
256	TFPI2	0.00702	0.254	0.0939	0.688	0.782	0.926	0.539	1.59
257	THBS4	0.0227	0.336	0.132	0.859	0.296	0.747	0.433	1.29
258	TIRAP	0.0349	2.73	1.07	6.95	0.321	1.32	0.764	2.27
259	TM6SF1	0.047	0.385	0.15	0.987	0.603	0.866	0.503	1.49
260	TMEFF2	0.0459	0.404	0.166	0.984	0.62	0.872	0.506	1.5
261	TMEM108	0.0231	0.335	0.13	0.861	0.907	0.968	0.563	1.66
262	TMEM125	0.0399	2.67	1.05	6.82	0.101	1.59	0.914	2.75
263	TMEM161B	0.0161	2.98	1.23	7.26	0.869	0.955	0.555	1.65
264	TMEM198	0.0416	2.54	1.04	6.24	0.614	0.87	0.507	1.49
265	TMEM200A	0.0326	0.379	0.156	0.923	0.835	0.944	0.55	1.62
266	TMEM200B	0.0347	0.382	0.156	0.933	0.118	0.642	0.368	1.12
267	TMEM63C	0.0336	0.381	0.157	0.928	0.783	1.08	0.628	1.85
268	TMEM74	0.0225	0.355	0.146	0.864	0.181	0.689	0.399	1.19
269	TMPRSS5	0.0483	2.57	1.01	6.57	0.862	0.953	0.555	1.64
270	TRIM17	0.0142	0.286	0.105	0.777	0.396	0.79	0.459	1.36
271	TRIM58	0.0045	0.208	0.0704	0.615	0.911	0.97	0.564	1.67
272	TRPC1	0.0287	0.366	0.149	0.901	0.981	0.994	0.578	1.71
273	TRPV4	0.0238	0.34	0.133	0.867	0.436	0.805	0.466	1.39
274	TSTD1	0.0478	2.41	1.01	5.77	0.448	1.23	0.717	2.12
275	TUSC3	0.0408	0.376	0.147	0.96	0.981	1.01	0.587	1.73
276	TXLNG	0.0394	2.56	1.05	6.25	0.722	1.1	0.643	1.89
277	UNC13A	0.0349	0.365	0.143	0.931	0.919	1.03	0.599	1.76
278	UQCC	0.0398	2.66	1.05	6.75	0.966	0.988	0.575	1.7
279	VEGFC	0.0314	0.359	0.141	0.913	0.804	0.934	0.543	1.61
280	VIPR2	0.00892	0.261	0.0954	0.714	0.693	0.896	0.521	1.54
281	ZFHX4	0.0285	0.352	0.138	0.896	0.532	1.19	0.692	2.04
282	ZG16B	0.0419	2.59	1.04	6.49	0.479	1.22	0.708	2.09
283	ZIC1	0.0335	0.378	0.154	0.927	0.78	1.08	0.629	1.85
284	ZNF227	0.0215	2.75	1.16	6.5	0.131	1.53	0.882	2.64
285	ZNF24	0.0392	2.56	1.05	6.24	0.841	1.06	0.615	1.82
286	ZNF254	0.0354	0.367	0.144	0.934	0.435	0.803	0.463	1.39
287	ZNF280D	0.0234	2.8	1.15	6.84	0.313	0.756	0.44	1.3
288	ZNF300	0.0172	0.32	0.125	0.817	0.898	0.965	0.562	1.66
289	ZNF302	0.00424	4.25	1.58	11.5	0.506	1.2	0.699	2.07
290	ZNF334	0.0426	0.398	0.163	0.97	0.368	0.777	0.449	1.35
291	ZNF343	0.0389	2.58	1.05	6.34	0.984	1.01	0.585	1.73
292	ZNF354C	0.0349	0.364	0.143	0.931	0.565	0.853	0.496	1.47
293	ZNF382	0.027	0.344	0.134	0.886	0.455	1.23	0.716	2.11
294	ZNF470	0.0349	0.365	0.143	0.931	0.752	1.09	0.636	1.87
295	ZNF512B	0.0187	0.3	0.11	0.819	0.286	0.741	0.427	1.29
296	ZNF528	0.0273	0.348	0.136	0.889	0.765	0.92	0.535	1.58
297	ZNF543	0.0123	3.15	1.28	7.75	0.501	0.831	0.484	1.43
298	ZNF549	0.0233	0.358	0.147	0.87	0.668	0.887	0.515	1.53
299	ZNF560	0.0193	0.326	0.128	0.834	0.69	1.12	0.65	1.92
300	ZNF569	0.0495	0.391	0.153	0.998	0.599	0.864	0.501	1.49
301	ZNF570	0.046	0.385	0.151	0.983	0.811	0.936	0.544	1.61
302	ZNF582	0.0294	0.353	0.139	0.901	0.933	0.977	0.569	1.68
303	ZNF677	0.0466	0.404	0.166	0.987	0.811	0.936	0.544	1.61
304	ZNF71	0.0219	0.336	0.132	0.854	0.553	1.18	0.686	2.02
305	ZNF720	0.0464	2.48	1.01	6.04	0.563	1.18	0.68	2.03
306	ZNF813	0.0286	0.326	0.12	0.889	0.77	0.922	0.536	1.59
307	ZSCAN1	0.0458	0.4	0.162	0.983	0.989	1	0.584	1.72
308	ZYG11A	0.00438	0.207	0.0702	0.612	0.538	0.844	0.491	1.45

## Sheet: Table S2
Table S2: The list of candidate proteins assocaited with the signature genes.
No.	Protein
1	MUC13
2	TRIM31
3	ISX
4	ALPI
5	REG3A
6	CEACAM7
7	REG4
8	EPS8L3
9	KRT20
10	GCNT3
11	ADGRG7
12	CTSE
13	SI
14	SPINK1
15	CDH17
16	CLCA1
17	CEACAM5
18	CLRN3
19	ETV7
20	REG1B
21	ANKS4B
22	C6orf222
23	APOBEC1
24	MUC17
25	PPP1R14D
26	ARL14
27	HHLA2
28	IYD
29	TFF2
30	MOGAT3
31	DEFA5
32	MEP1A
33	MS4A8
34	SLC6A20
35	REG1A
36	SMOC2
37	NMUR1
38	PODN
39	TNXB
40	HRC
41	COX6A2
42	ADGRB1
43	HSPB7
44	ROR2
45	DHRS7C
46	ABCC8
47	CACNA1H
48	DISP3
49	GRIN1
50	GIPC3
51	WNK2
52	PTPRT
53	RET
54	CHRND
55	AJAP1
56	CHRNA4
57	RAX
58	BTBD17
59	HMCN2
60	GSC
61	ASPG
62	ADCY5
63	DIO3
64	SMOC1
65	TMEM178B
66	TPO
67	PTPN5
68	SLC6A3
69	VIPR2
70	DDX23
71	NEK9
72	RNF20
73	RPAP3
74	SEC23IP
75	PRKAG1
76	METTL13
77	CPSF2
78	PDCD11
79	POLR3A
80	UBTF
81	ENOX2
82	LARS
83	TCHP
84	HNRNPU
85	ASXL2
86	FAM208A
87	ELAVL1
88	NUP133
89	AATF
90	ME2
91	DROSHA
92	CCDC77
93	TFCP2
94	ZNF512
95	DNAJC14
96	EIF2B1
97	ATF1
98	COPZ1
99	DENR
100	NUPL2
101	TMEM218
102	CSRNP2
103	SMARCAL1
104	BLMH
105	HIF1AN
106	FAM98B
107	KAT14
108	SUOX
109	UQCC1
110	PYCR2
111	AP3M1
112	AAAS
113	ZNF740
114	EDC3
115	TRIP4
116	IPO8
117	ZNF41
118	M6PR
119	SMUG1
120	CHTF8
121	ABCG8
122	AGXT
123	MASP2
124	F2
125	TM4SF5
126	APOA5
127	C8A
128	HAO1
129	SERPINA4
130	PROZ
131	ITIH1
132	SLCO1B1
133	AMBP
134	PLG
135	CRP
136	SAA4
137	CFHR5
138	CSF2
139	SERPINA6
140	SLC17A2
141	APCS
142	GC
143	GCKR
144	FNDC4
145	ABCB11
146	C11orf86
147	IGFBP1
148	GKN1
149	NR1H4
150	NPC1L1
151	ADRA1B
152	FSHB
153	GNAT1
154	TM6SF2
155	CREBZF
156	AHSA2P
157	OGT
158	ARGLU1
159	PRPF39
160	FAM76B
161	KHDC4
162	PCF11
163	PNN
164	LUC7L3
165	ANKRD49
166	ZNF767P
167	ZRANB2
168	DDX17
169	TTC14
170	EPM2AIP1
171	LINC00115
172	SRSF1
173	ZNF224
174	METTL3
175	EMSY
176	CCNT2
177	THUMPD3-AS1
178	TAF1D
179	SNHG10
180	RSRP1
181	CPSF6
182	DMTF1
183	TIA1
184	ZNF550
185	PAXBP1
186	HNRNPH1
187	CLK4
188	CEP57
189	NSUN5P1
190	TRMT11
191	FUBP1
192	SNHG1
193	LOC100289230
194	EED
195	PSMA3-AS1
196	ZBED5
197	REV1
198	TBRG1
199	KLRA1P
200	AKAP17A
201	SS18L1
202	CCNL1
203	SRSF5
204	NFKBIZ
205	TRA2B
206	ZFP36
207	CLK1
208	RSRC2
209	FNBP4
210	CHD2
211	CWC25
212	PPP1R15A
213	JUNB
214	IER2
215	FOS
216	MCL1
217	ZFC3H1
218	CSRNP1
219	JUN
220	TIPARP
221	PNISR
222	DDX5
223	KLF6
224	IFRD1
225	SREK1
226	TNFAIP3
227	GADD45B
228	U2SURP
229	PHC3
230	PELI1
231	ATF3
232	CCNL2
233	FOSB
234	DUSP1
235	RBM39
236	RBBP6
237	TSC22D2
238	ZMYM5
239	ZFAND5
240	EIF4A2
241	U2AF1
242	VCPKMT
